# Supplementary material for: Cross-Sectional Association of Dietary Patterns and Supplement Intake with Presence and Gray-Scale Median of Carotid Plaques—A Comparison between Women and Men in the Population-Based Hamburg City Health Study
Source: MDPI journal article supplement (doi:10.3390/nu15061468), 2023-03-18
Supplement: s1 [file s1]

## Supplementary Materials

**Table S1.** Criteria for Mediterranean Dietary Score.

| Score item | MEDAS Question                                                                                                       | Data recorded by FFQ<br>1 point given, if ...                                                                                                                     |
|------------|----------------------------------------------------------------------------------------------------------------------|-------------------------------------------------------------------------------------------------------------------------------------------------------------------|
| 1          | Do you use olive oil as the principal source of fat for cooking?                                                     | use of olive oil for the preparation of at least 2 of the following groceries: salad, vegetable, meat/fish                                                        |
| 2          | How much olive oil do you consume per day (including that used in frying, salads, meals eaten away from home, etc.)? | based on FFQ2 calculation, if >48 g vegetable oil per day                                                                                                         |
| 3          | How many servings of vegetables do you consume per day?                                                              | based on FFQ2 calculation, if ≥2 portions of vegetables per day (including raw and cooked vegetables, salad, olives, mushrooms except potatoes and legumes)       |
| 4          | How many pieces of fruit (including fresh-squeezed juice) do you consume per day?                                    | based on FFQ2 calculation, if ≥3 portions of fruit (including fruit, mixed fruit, fruit salad, mixed stewed fruit and fruit juices excluding sweetened beverages) |
| 5          | How many servings of red meat, hamburger, or sausages do you consume per day?                                        | based on FFQ2 calculation, if <100 g red meat (eg beef, veal, pork, lamb) and processed meat products                                                             |
| 6          | How many servings (12 g) of butter, margarine, or cream do you consume per day?                                      | based on FFQ2 calculation, if <1 portion butter, margarine and cream and other animal fat                                                                         |
| 7          | How many carbonated and/or sugar-sweetened beverages do you consume per day?                                         | based on FFQ2 calculation, sugar-sweetened beverages <1 portion per day (including lemonade and colas)                                                            |
| 8          | Do you drink wine? How much do you consume per week?                                                                 | based on FFQ2 calculation, if ≥7 portions wine (red and white wine; 1 portion = 0.251)                                                                            |
| 9          | How many servings of pulses do you consume per week?                                                                 | ≥3 portions pulses (e.g., beans, lentils, peas, chickpeas)                                                                                                        |
| 10         | How many servings of fish/seafood do you consume per week?                                                           | based on FFQ2 calculation, if ≥3 portions fish products and seafood per week                                                                                      |

|    |                                                                                                                                                              |                                                                                                                                                           |
|----|--------------------------------------------------------------------------------------------------------------------------------------------------------------|-----------------------------------------------------------------------------------------------------------------------------------------------------------|
| 11 | How many times do you consume commercial (not homemade) pastry such as cookies or cake per week?                                                             | based on FFQ2 calculation, if <3 portions cakes, chocolate, cookies, sweets with and without chocolate per week                                           |
| 12 | How many times do you consume nuts per week?                                                                                                                 | based on FFQ2 calculation, if _3 portions nuts per week                                                                                                   |
| 13 | Do you prefer to eat chicken, turkey or rabbit instead of beef, pork, hamburgers, or sausages?                                                               | Based on FFQ2 calculation, if g white meat (e.g., chicken, hen and other poultry) > g red meat (e.g., beef, veal, pork, lamb and processed meat products) |
| 14 | How many times per week do you consume boiled vegetables, pasta, rice, or other dishes with a sauce of tomato, garlic, onion, or leeks sautéed in olive oil? | >1–2 times a week tomato sauce                                                                                                                            |

**Table S2.** Scoring system for Dietary Approaches to Stop Hypertension (DASH) diet.

| Score item | DASH component   | Scoring |
|------------|------------------|---------|
| 1          | Total Grain      |         |
|            | ≥7 servings/day  | 1       |
|            | 5–6 servings/day | 0.5     |
|            | <5 servings/day  | 0       |
| 2          | Vegetables       | 1       |
|            | ≥4 servings/day  | 0.5     |
|            | 2–3 servings/day | 0       |
|            | <2 servings/day  |         |
| 3          | Fruits           | 1       |
|            | ≥4 servings/day  | 0.5     |
|            | 2–3 servings/day | 0       |
|            | <2 servings/day  |         |

|    |                           |     |
|----|---------------------------|-----|
| 4  | Total dairy               | 1   |
|    | ≥2 servings/day           | 0.5 |
|    | 1 servings/day            | 0   |
|    | <1 serving/day            |     |
| 5  | Meat, poultry, and fish   | 1   |
|    | ≥2 servings/day           | 0.5 |
|    | 3 servings/day            | 0   |
|    | ≥4 serving/day            |     |
| 6  | Nuts, seeds, and legumes  | 1   |
|    | ≥4 servings/day           | 0.5 |
|    | 2–3 servings/day          | 0   |
|    | <2 servings/day           |     |
| 7  | % kcal from fat           | 1   |
|    | ≤27%                      | 0.5 |
|    | ≥28 ≤29%                  | 0   |
|    | ≥30%                      |     |
| 8  | % kcal from saturated fat | 1   |
|    | ≤6%                       | 0.5 |
|    | ≤7 ≥8%                    | 0   |
|    | ≥9%                       |     |
| 9  | Sweets                    | 1   |
|    | ≤5 servings/week          | 0.5 |
|    | 6–7 servings/week         | 0   |
|    | ≥8 serving/week           |     |
| 10 | Sodium                    | 1   |
|    | ≤2400 mg/day 1            | 0.5 |
|    | 2400–3000 mg/day 0.5      | 0   |
|    | >3000 mg/day              |     |

---

**Table S3.** Logistic regression models regarding the presence of carotid plaques.

| Characteristics                      | MEDAS             |                 | DASH              |                 | Supplement intake |                 |
|--------------------------------------|-------------------|-----------------|-------------------|-----------------|-------------------|-----------------|
|                                      | OR (95% CI)       | <i>p</i> -value | OR (95% CI)       | <i>p</i> -value | OR (95% CI)       | <i>p</i> -value |
| Age 66-77 vs. age ≤ 65               | 2.53 (2.23, 2.87) | <0.001          | 2.5 (2.21, 2.84)  | <0.001          | 2.56 (2.25, 2.9)  | <0.001          |
| Male vs. female sex                  | 1.61 (1.41, 1.84) | <0.001          | 1.6 (1.41, 1.82)  | <0.001          | 1.52 (1.34, 1.73) | <0.001          |
| Low vs. medium education             | 1.22 (1.03, 1.45) | 0.02            | 1.22 (1.03, 1.45) | 0.023           | 1.21 (1.02, 1.44) | 0.03            |
| High vs. medium education            | 0.93 (0.79, 1.1)  | 0.400           | 0.93 (0.79, 1.1)  | 0.4             | 0.95 (0.8, 1.13)  | 0.571           |
| BMI                                  | 0.99 (0.97, 1)    | 0.065           | 0.99 (0.97, 1)    | 0.078           | 0.99 (0.97, 1)    | 0.075           |
| Diabetes yes vs. no                  | 1.09 (0.87, 1.35) | 0.449           | 1.09 (0.88, 1.35) | 0.447           | 1.1 (0.88, 1.36)  | 0.415           |
| Hypertension yes vs. no              | 1.72 (1.49, 1.99) | <0.001          | 1.72 (1.49, 1.99) | <0.001          | 1.69 (1.47, 1.96) | <0.001          |
| Hyperlipidemia yes vs. no            | 1.69 (1.45, 1.97) | <0.001          | 1.68 (1.45, 1.96) | <0.001          | 1.7 (1.45, 1.98)  | <0.001          |
| Current smoking vs. Non-smoking      | 1.7 (1.46, 1.98)  | <0.001          | 1.7 (1.46, 1.98)  | <0.001          | 1.67 (1.44, 1.94) | <0.001          |
| Metabolic syndrome yes vs. no        | 1.15 (0.98, 1.34) | 0.076           | 1.15 (0.99, 1.34) | 0.075           | 1.14 (0.97, 1.33) | 0.104           |
| Heart failure yes vs. no             | 1.22 (0.92, 1.62) | 0.166           | 1.22 (0.92, 1.62) | 0.176           | 1.24 (0.93, 1.65) | 0.138           |
| Atrial fibrillation yes vs. no       | 1.08 (0.85, 1.37) | 0.524           | 1.09 (0.86, 1.38) | 0.489           | 1.09 (0.86, 1.39) | 0.463           |
| Myocardial infarction ever vs. never | 1.34 (0.95, 1.91) | 0.101           | 1.35 (0.95, 1.92) | 0.093           | 1.34 (0.95, 1.91) | 0.095           |
| Stroke ever vs. never                | 1.32 (0.95, 1.84) | 0.096           | 1.34 (0.96, 1.86) | 0.084           | 1.29 (0.93, 1.79) | 0.126           |
| Regular physical exercise yes vs. no | 0.84 (0.69, 1.03) | 0.095           | 0.85 (0.69, 1.04) | 0.114           | 0.86 (0.71, 1.06) | 0.153           |

This table shows results of additional analyses of logistic regression models regarding the presence of carotid plaques in full HCHS-sub-cohort, including 10,000 participants. All models are adjusted for age, sex, education, body-mass index, diabetes mellitus, arterial hypertension, hyperlipidemia, smoking status, heart failure, atrial fibrillation, myocardial infarction, stroke and sports. Abbreviations: OR, odds ratio; CI, confidence interval; MEDAS, Mediterranean Diet Adherence Score; DASH, Dietary Approach to Stop Hypertension
